# Supplementary material for: A sting in the spit: widespread cross‐infection of multiple RNA viruses across wild and managed bees
Source: PubMed Central journal article supplement (PMC4832299; doi:10.1111/1365-2656.12345), 2015-03-03
Supplement: JANE-84-615-s001.pdf [file JANE-84-615-s001.pdf]

| Primer Target  | Name         | Sequence                    | Application  | Reference  |
|----------------|--------------|-----------------------------|--------------|------------|
| VDV (RdRp)     | VDV-F2       | TATCTTCATTA AAAACCGCCAGGCT  | qPCR         | This study |
| VDV (RdRp)     | VDV-R2a      | CTTCCTCATTA AACTGAGTTGTTGTC | qPCR         | This study |
| DWV (RdRp)     | DWV-F2       | TGTCTTCATTA AAGCCACCTGGAA   | qPCR         | This study |
| DWV (RdRp)     | DWV-R2a      | TTTCCTCATTA AACTGTGTCGTTGAT | qPCR         | This study |
| DWV (RdRp)     | DWV-F1a      | GGAAACATCTG GAATTAGCGACAAA  | Stand' curve | This study |
| VDV (RdRp)     | VDV-F1a      | GAAAACATTTG GAATTAGCAACGAC  | Stand' curve | This study |
| DWV/VDV (RdRp) | DWVDV-7A-R   | AATCCGTGAAT ATAGTGTGAGG     | Stand' curve | This study |
| SBPV           | SPV-F3177    | GCGCTTTAGTT CAATTGCC        | qPCR         | [1]        |
| SBPV           | SPV-B3363    | ATTATAGGACG TGAAAATATAC     | qPCR         | "          |
| ABPV           | ABPV-F6548   | TCATACCTGCC GATCAAG         | qPCR         | [2]        |
| KBV            | KBV-F6639    | CCATACCTGCT GATAACC         | qPCR         | "          |
| IAPV           | IAPV-F6627   | CCATGCCTGGC GATTAC          | qPCR         | "          |
| ABPV/IAPV      | KIABPV-B6707 | CTGAATAACTG TGCGTATC        | qPCR         | "          |
| BQCV           | BQCV-F7893   | AGTGCCGGAG ATGTATGC         | qPCR         | [3]        |
| BQCV           | BQCV-B8150   | GGAGGTGAAGT GGCTATATC       | qPCR         | "          |
| SBV            | SBV-F3164    | TTGGAACTACG CATTCTCTG       | qPCR         | "          |
| SBV            | SBV-B3461    | GCTCTAACCTC GCATCAAC        | qPCR         | "          |
| $\beta$ -actin | Am-actin2-qF | CGTGCCGATAG TATTCTTG        | qPCR         | "          |
| $\beta$ -actin | Am-actin2-qB | CTTCGTCACCA ACATAGG         | qPCR         | "          |

**Table S1.** List of RT-PCR primers used in this study alongside their use and reference.

1. de Miranda, J.R. *et al.* (2010). Genetic characterization of slow bee paralysis virus of the honeybee (*Apis mellifera* L.). *J. Gen. Virol.*, 91, 2524-2530.
2. de Miranda, J.R., Cordoni, G., & Budge, G. (2010). The Acute bee paralysis virus-Kashmir bee virus-Israeli acute paralysis virus complex. *J. Invertebr. Pathol.*, 103, S30-47 (2010)
3. Locke, B., Forsgren, E., Fries, I., & de Miranda, J.R. (2012). Acaricide treatment affects viral dynamics in *Varroa destructor*-infested honey bee colonies via both host physiology and mite control. *Appl. Environ. Microb.*, 78, 227-235.
