# Supplementary material for: A sting in the spit: widespread cross‐infection of multiple RNA viruses across wild and managed bees
Source: PubMed Central journal article supplement (PMC4832299; doi:10.1111/1365-2656.12345), 2015-03-03
Supplement: JANE-84-615-s002.pdf [file JANE-84-615-s002.pdf]

| Site | Collection Date | Honeybees | Bumblebees | Species 1 (N)             | Species 2 (N)            | Species 3 (N)            | Species 4 (N)          |
|------|-----------------|-----------|------------|---------------------------|--------------------------|--------------------------|------------------------|
| A    | 7/22/11         | 10        | 24         | <i>B. pascuorum</i> (10)  | <i>B. terrestris</i> (7) | <i>B. lucorum</i> (7)    |                        |
| B    | 8/14/11         | 10        | 19         | <i>B. hortorum</i> (10)   | <i>B. lucorum</i> (9)    |                          |                        |
| C    | 8/2/11          | 9         | 20         | <i>B. pascuorum</i> (10)  | <i>B. lucorum</i> (7)    | <i>B. terrestris</i> (3) |                        |
| D    | 8/16/11         | 10        | 16         | <i>B. lapidarius</i> (10) | <i>B. lucorum</i> (4)    | <i>B. terrestris</i> (2) |                        |
| E    | 7/22/11         | 10        | 15         | <i>B. lapidarius</i> (10) | <i>B. lucorum</i> (2)    | <i>B. terrestris</i> (2) | <i>B. sp.</i> (1)**    |
| F    | 7/24/11         | 7         | 13         | <i>B. lapidarius</i> (9)  | <i>B. terrestris</i> (4) |                          |                        |
| G**  | 7/20/11         | 0         | 15         | <i>B. lapidarius</i> (10) | <i>B. lucorum</i> (4)    | <i>B. terrestris</i> (3) |                        |
| H    | 7/31/11         | 10        | 12         | <i>B. lapidarius</i> (7)  | <i>B. lucorum</i> (4)    | <i>B. terrestris</i> (1) |                        |
| I    | 6/24/11         | 4         | 11         | <i>B. lapidarius</i> (6)  | <i>B. lucorum</i> (5)    |                          |                        |
| J    | 6/16/11         | 8         | 19         | <i>B. lapidarius</i> (11) | <i>B. lucorum</i> (4)    | <i>B. terrestris</i> (4) |                        |
| K    | 6/15/11         | 4         | 16         | <i>B. lapidarius</i> (10) | <i>B. lucorum</i> (4)    | <i>B. terrestris</i> (2) |                        |
| L    | 6/26/11         | 10        | 19         | <i>B. lapidarius</i> (9)  | <i>B. hortorum</i> (6)   | <i>B. terrestris</i> (3) | <i>B. lucorum</i> (1)  |
| M    | 6/5/11          | 17        | 27         | <i>B. lapidarius</i> (15) | <i>B. terrestris</i> (8) | <i>B. hortorum</i> (3)   | <i>B. pratorum</i> (1) |
| N    | 6/25/11         | 10        | 12         | <i>B. lapidarius</i> (6)  | <i>B. terrestris</i> (4) | <i>B. lucorum</i> (2)    |                        |
| O    | 7/25/11         | 8         | 17         | <i>B. pascuorum</i> (10)  | <i>B. terrestris</i> (5) | <i>B. hortorum</i> (1)   | <i>B. sp.</i> (1)      |
| P    | 7/28/11         | 10        | 17         | <i>B. monticola</i> (7)   | <i>B. terrestris</i> (5) | <i>B. spp.</i> (5)**     |                        |
| Q    | 6/27/11         | 9         | 19         | <i>B. lapidarius</i> (10) | <i>B. terrestris</i> (7) | <i>B. lucorum</i> (2)    |                        |
| R    | 6/24/11         | 10        | 9          | <i>B. lapidarius</i> (4)  | <i>B. terrestris</i> (2) | <i>B. lucorum</i> (2)    | <i>B. jonellus</i> (1) |
| S    | 6/30/11         | 10        | 20         | <i>B. lapidarius</i> (9)  | <i>B. lucorum</i> (6)    | <i>B. terrestris</i> (3) | <i>B. pratorum</i> (2) |
| T    | 7/9/11          | 15        | 28         | <i>B. lapidarius</i> (15) | <i>B. terrestris</i> (9) | <i>B. lucorum</i> (4)    |                        |
| U    | 7/23/11         | 10        | 20         | <i>B. pascuorum</i> (10)  | <i>B. terrestris</i> (6) | <i>B. lucorum</i> (4)    |                        |
| V    | 7/3/11          | 9         | 14         | <i>B. lapidarius</i> (9)  | <i>B. terrestris</i> (3) | <i>B. lucorum</i> (2)    |                        |
| W    | 6/15/11         | 9         | 18         | <i>B. lapidarius</i> (9)  | <i>B. lucorum</i> (8)    | <i>B. terrestris</i> (1) |                        |
| X    | 6/14/11         | 9         | 20         | <i>B. lapidarius</i> (10) | <i>B. lucorum</i> (7)    | <i>B. terrestris</i> (3) |                        |
| Y    | 7/29/11         | 10        | 20         | <i>B. hortorum</i> (10)   | <i>B. pascuorum</i> (10) |                          |                        |
| Z    | 7/9/11          | 9         | 13         | <i>B. terrestris</i> (5)  | <i>B. pascuorum</i> (5)  | <i>B. lucorum</i> (3)    |                        |

**Table S2.** Total sample size and species composition (passing quality control) at each site. Unidentified species given as ‘*B. sp.*’ \*\*Not used in GLMM analyses.
