# Supplementary material for: A sting in the spit: widespread cross‐infection of multiple RNA viruses across wild and managed bees
Source: PubMed Central journal article supplement (PMC4832299; doi:10.1111/1365-2656.12345), 2015-03-03
Supplement: JANE-84-615-s003.pdf [file JANE-84-615-s003.pdf]

| a) GLMM                      |       |                           |          |       |         |         |
|------------------------------|-------|---------------------------|----------|-------|---------|---------|
| Response                     | Virus | Parameters                | Estimate | SE    | z-value | P-value |
| <i>Apis</i> virus prevalence | BQCV  | Intercept                 | -2.505   | 0.338 | -7.421  |         |
|                              |       | <i>Bombus</i> BQCV        | 0.890    | 0.288 | 3.091   | 0.002*  |
|                              | DWV   | Intercept                 | -0.843   | 0.287 | -2.934  |         |
|                              |       | <i>Bombus</i> DWV         | 0.485    | 0.280 | 1.731   | 0.083   |
|                              | ABPV  | Intercept                 | -5.242   | 1.112 | -4.713  |         |
|                              |       | <i>Bombus</i> ABPV        | 1.873    | 0.670 | 2.796   | 0.005*  |
| b) GLM                       |       |                           |          |       |         |         |
| <i>Apis</i> virus prevalence |       | Intercept                 | 0.299    | 0.078 | 3.831   |         |
|                              |       | <i>Bombus</i> all viruses | 1.002    | 0.220 | 4.546   | <0.001* |
|                              |       | Latitude                  | -0.100   | 0.057 | -1.736  | 0.097   |

**Table S3.** (a) Best GLMM models explaining individual virus prevalence in *A. mellifera* using AIC for model selection. \*Significant variables.  $r^2_c = 0.36; 0.36; 0.64$  and  $r^2_m = 0.15; 0.19; 0.38$  for BQCV, DWV and ABPV, respectively. (b) Best GLM model explaining total RNA virus prevalence in *A. mellifera*, using AICc for model selection (b). \*Significant variables. Nagelkerke  $r^2 = 0.59$
