# Supplementary material for: A sting in the spit: widespread cross‐infection of multiple RNA viruses across wild and managed bees
Source: PubMed Central journal article supplement (PMC4832299; doi:10.1111/1365-2656.12345), 2015-03-03
Supplement: JANE-84-615-s006.pdf [file JANE-84-615-s006.pdf]

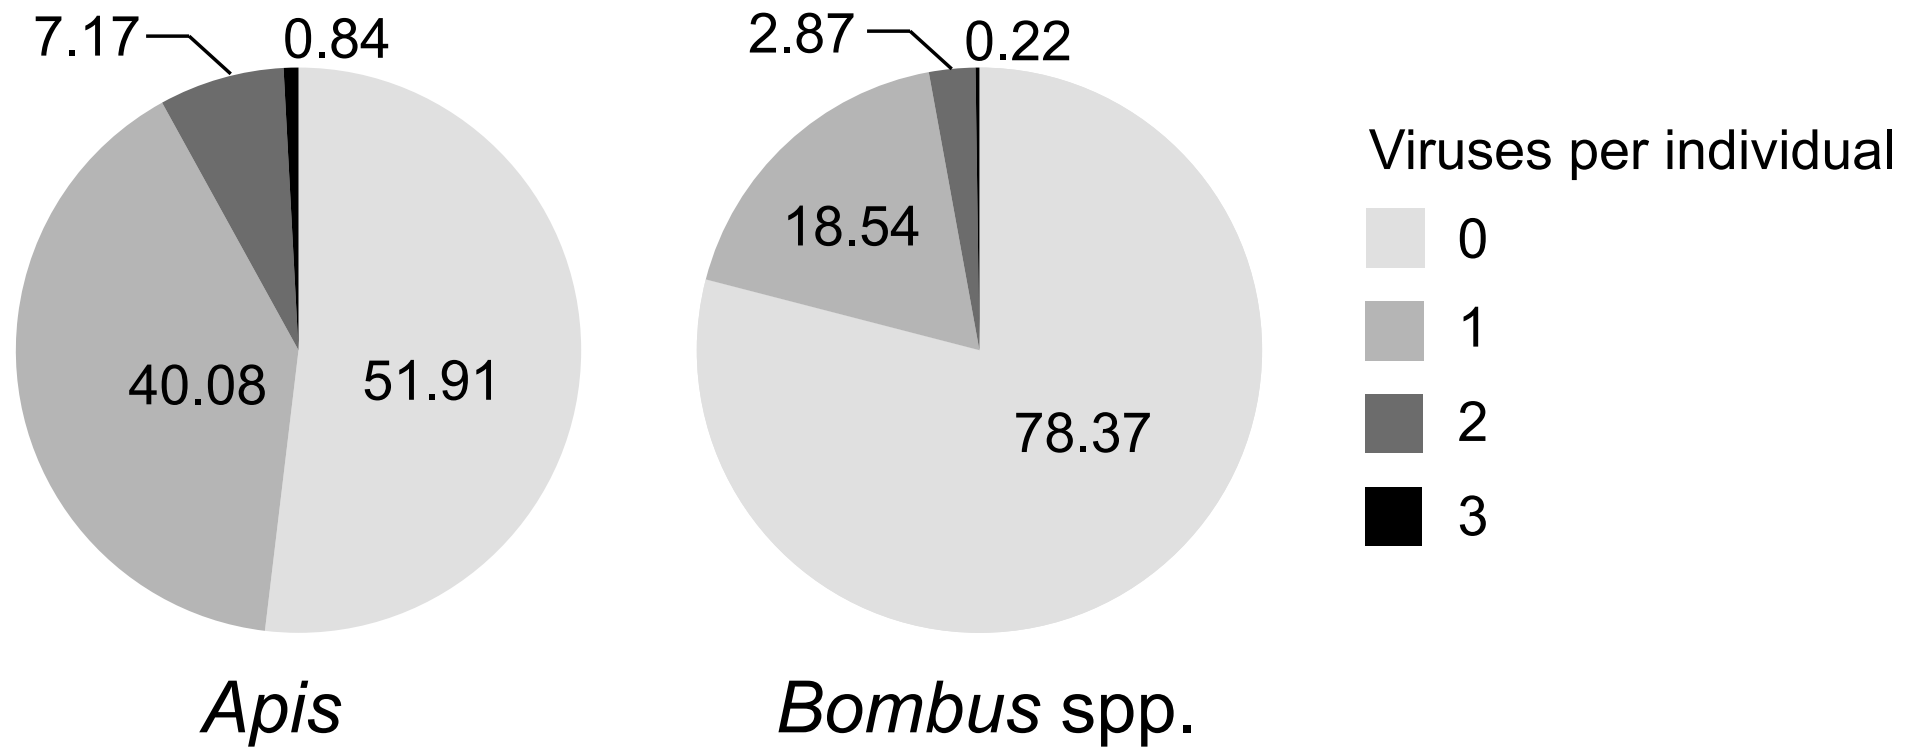

**Fig. S3.** Summary prevalence (%) of RNA viruses in *A. mellifera* and *Bombus* spp. pollinators. Note that values indicated are based on the raw data and not true prevalences
