# Supplementary material for: A sting in the spit: widespread cross‐infection of multiple RNA viruses across wild and managed bees
Source: PubMed Central journal article supplement (PMC4832299; doi:10.1111/1365-2656.12345), 2015-03-03
Supplement: JANE-84-615-s007.pdf [file JANE-84-615-s007.pdf]

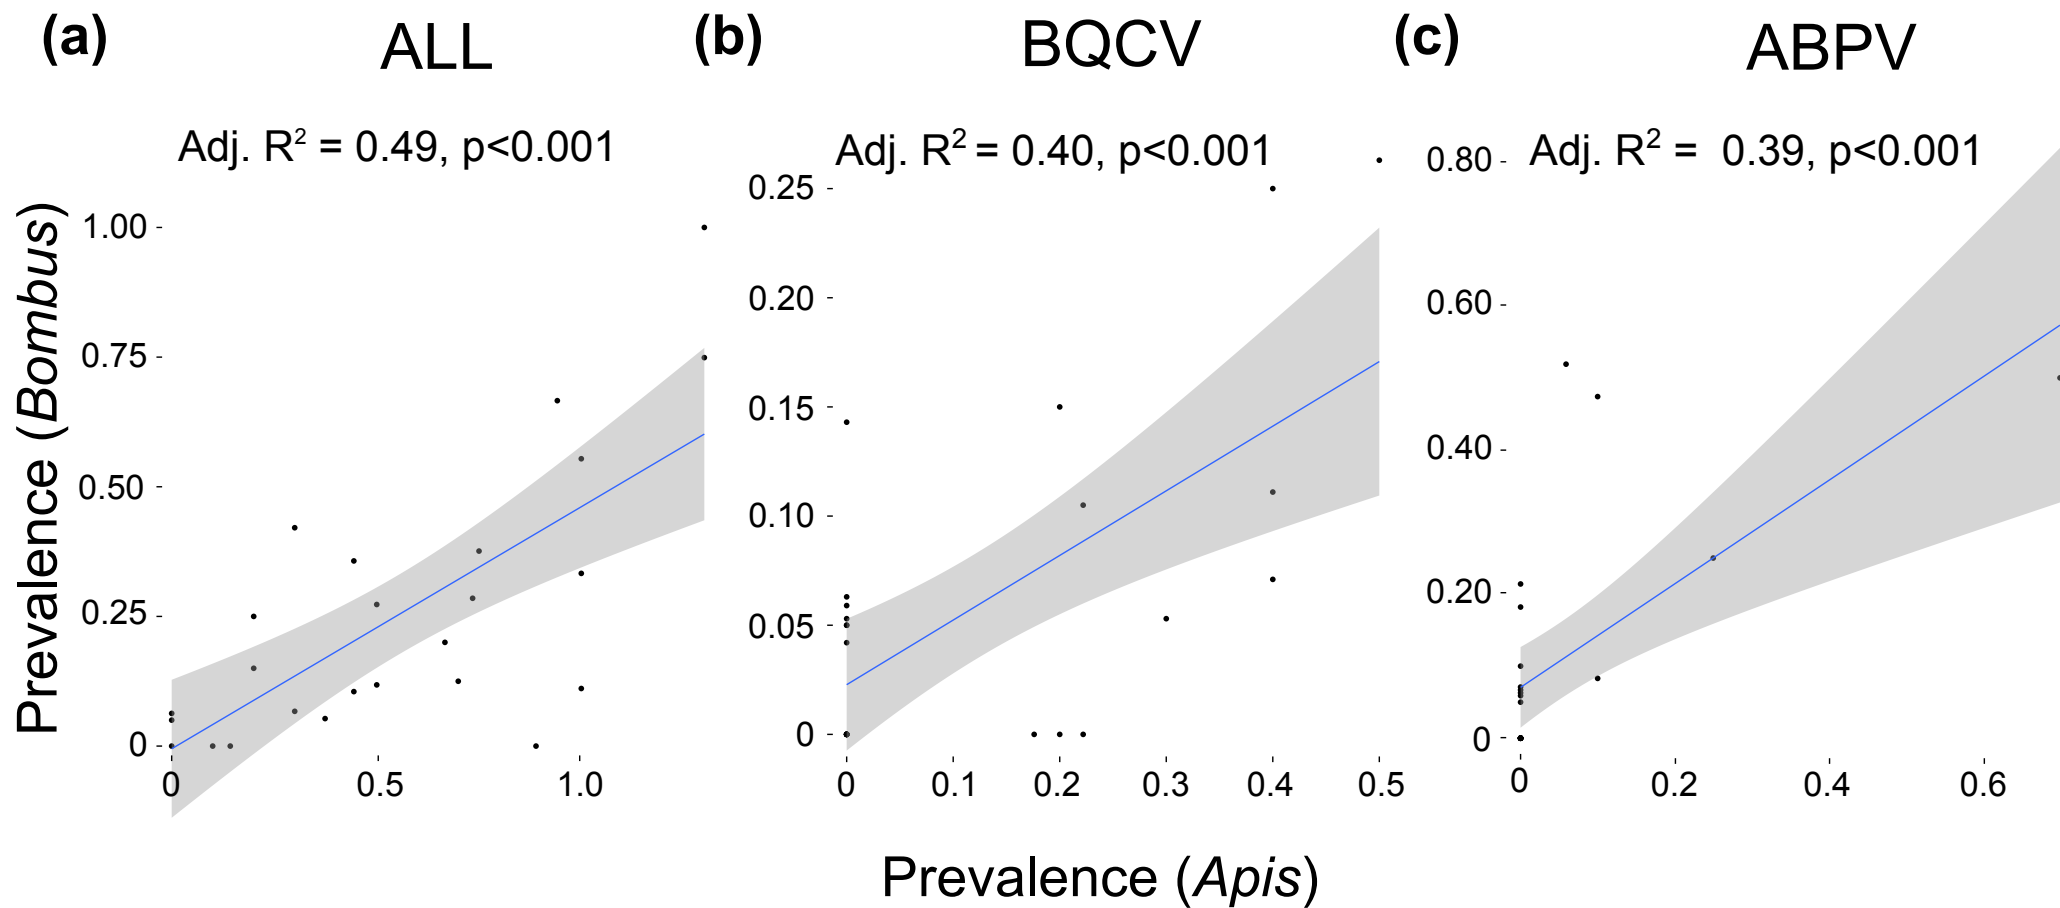

**Fig. S4.** Linear regression of raw data illustrating the relationship between virus prevalence in *Bombus* spp. and *A. mellifera*: (a) All viruses combined (Adj.  $R^2 = 0.49$ ,  $p < 0.001$ ); (b) BQCV (Adj.  $R^2 = 0.40$ ,  $p < 0.001$ ); (c) ABPV (Adj.  $R^2 = 0.39$ ,  $p < 0.001$ ).
